# Supplementary material for: Roll coated large area ITO- and vacuum-free all organic solar cells from diketopyrrolopyrrole based non-fullerene acceptors with molecular geometry effects
Source: Royal Society of Chemistry journal article supplement (doi:10.1039/c6ra06898g), 2016-01-01
Supplement: c6ra06898g1.pdf [file c6ra06898g1.pdf]

# Roll coated large area ITO- and vacuum-free all organic solar cells from diketopyrrolopyrrole based non-fullerene acceptors with molecular geometry effects

Rasmus Guldbæk Brandt<sup>a,b</sup>, Fei Zhang<sup>c</sup>, Thomas Rieks Andersen<sup>d,†</sup>, Dechan Angmo<sup>d</sup>, Minmin Shi<sup>c</sup>, Leonid Gurevich<sup>e</sup>, Frederik C. Krebs<sup>d</sup>, Jens Wenzel Andreasen<sup>d</sup> and Donghong Yu<sup>a,b,\*</sup>

<sup>a</sup> Department of Chemistry and Bioscience, Aalborg University, Fredrik Bajers Vej 7H, DK-9220 Aalborg East, Denmark

<sup>b</sup> Sino-Danish Centre for Education and Research (SDC), Niels Jensens Vej 2, DK-8000 Aarhus, Denmark

<sup>c</sup> MOE Key Laboratory of Macromolecular Synthesis and Functionalization, Department of Polymer Science and Engineering, & State Key Lab of Silicon Materials, Zhejiang University, Hangzhou 310027, P. R. China

<sup>d</sup> Department of Energy Conversion and Storage, Technical University of Denmark, Frederiksborgvej 399, DK-4000 Roskilde, Denmark

<sup>†</sup> Current address: Centre for Organic Electronics, University of Newcastle, University Drive, Callaghan, NSW 2308, Australia

<sup>e</sup> Department of Physics and Nanotechnology, Aalborg University, Skjernvej 4, DK-9220 Aalborg East, Denmark

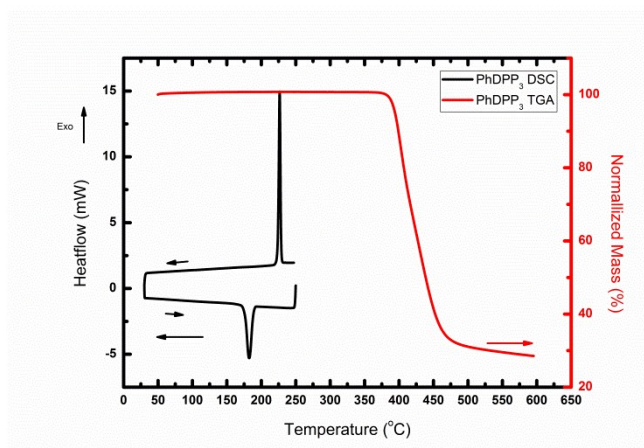

ESI Fig 1: Differential scanning calorimetry (DSC, black) and thermal gravimetric analysis (TGA, red) of Ph(DPP)<sub>3</sub>, which was performed under nitrogen atmosphere at a heating rate of 20 °C/min.

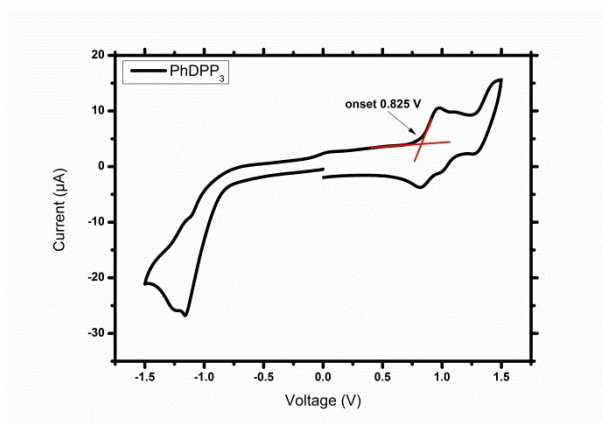

ESI Fig 2: Cyclic voltammetry (CV) of Ph(DPP)<sub>3</sub>, the oxidation onset is marked with an arrow.
